# Supplementary material for: A UiO-66-NH2 MOF derived N doped porous carbon and ZrO2 composite cathode for zinc-ion hybrid supercapacitors
Source: Royal Society of Chemistry journal article supplement (doi:10.1039/d2qi02777a), 2023-01-01
Supplement: d2qi02777a1.pdf [file d2qi02777a1.pdf]

# **UiO-66-NH<sub>2</sub> MOF derived N doped Porous Carbon and ZrO<sub>2</sub> Composite Cathode for Zinc-Ion Hybrid Supercapacitors**

Xiaoqi Wang<sup>1,3</sup>, Hu Hong<sup>2</sup>, Shuo Yang<sup>2</sup>, Shengchi Bai<sup>3</sup>, Rui Yang<sup>3</sup>, Xu Jin<sup>3</sup>, Chunyi Zhi<sup>2\*</sup>, Bo Wang<sup>1\*</sup>

<sup>1</sup>School of Chemistry and Chemical Engineering, Beijing Institute of Technology, Beijing 100081, China.

<sup>2</sup>Department of Materials Science and Engineering, City University of Hong Kong, 83 Tat Chee Avenue, Kowloon, China

<sup>3</sup>Research Institute of Petroleum Exploration & Development (RIPED), China National Petroleum Corporation, Beijing, 100083, China

\*email: [cy.zhi@cityu.edu.hk](mailto:cy.zhi@cityu.edu.hk); [bowang@bit.edu.cn](mailto:bowang@bit.edu.cn)

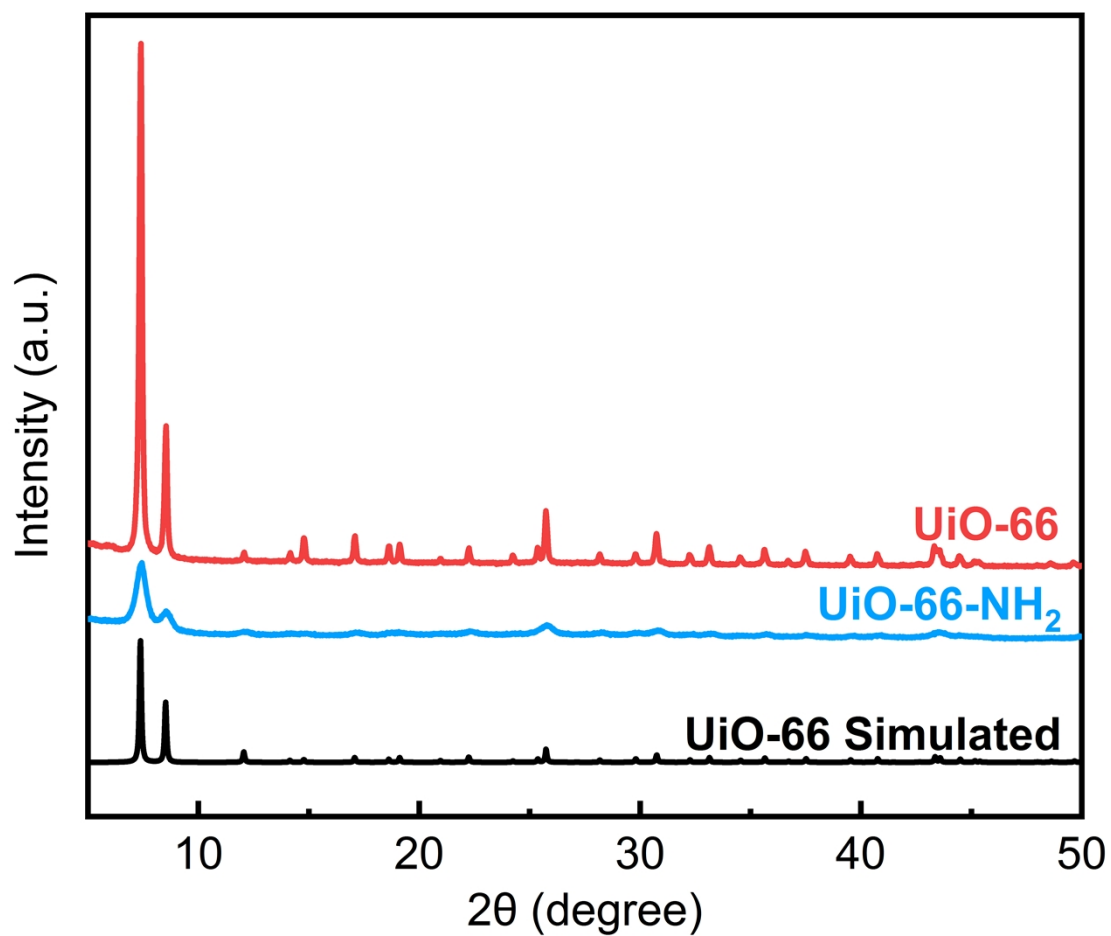

**Fig. S1** XRD patterns of the as-synthesized UiO-66, UiO-66-NH<sub>2</sub> samples, and simulated XRD pattern of the UiO-66, respectively.

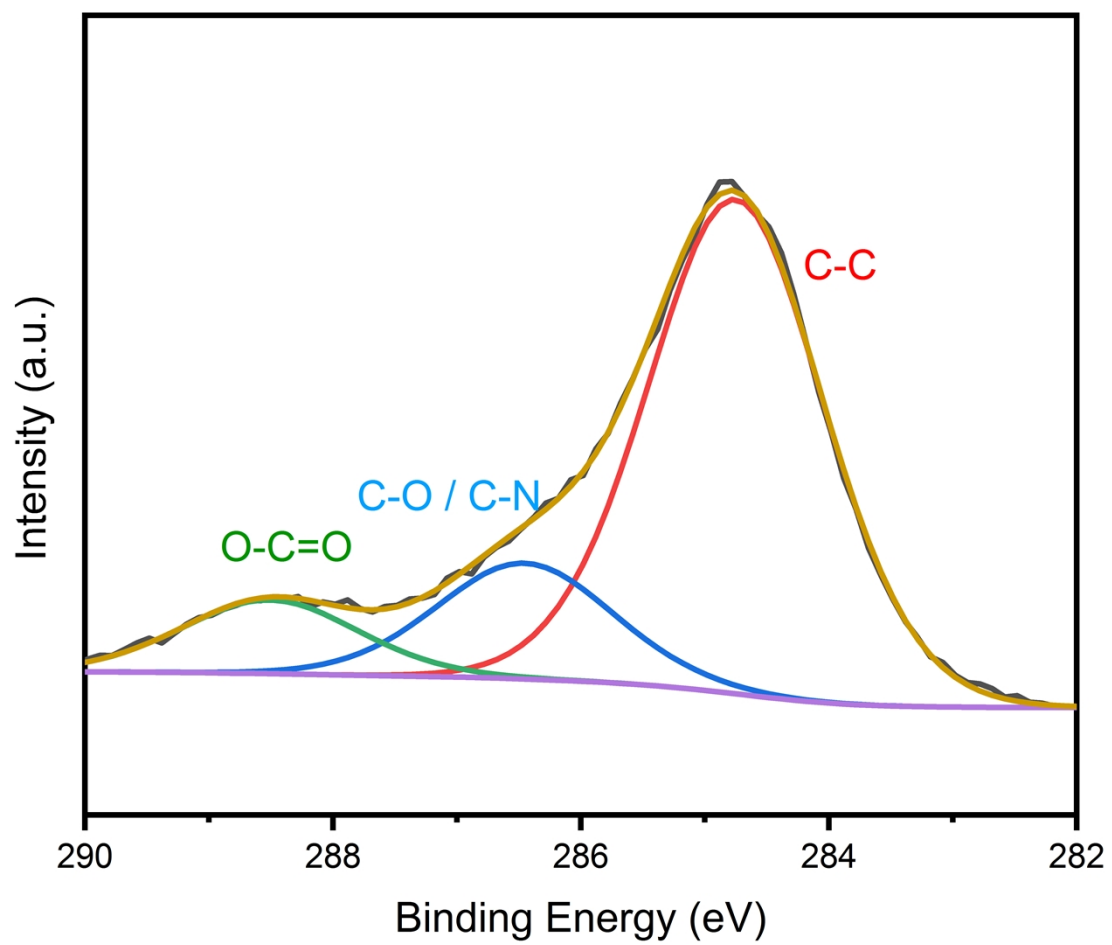

**Fig. S2** High resolution XPS spectrum of C 1s for NC@ZrO<sub>2</sub> composite.

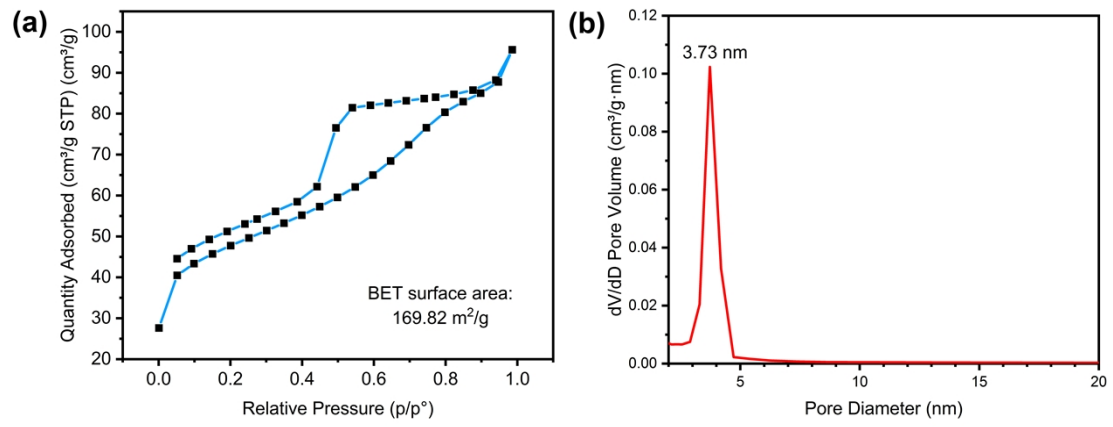

**Fig. S3** (a) N<sub>2</sub> adsorption and desorption curves of C@ZrO<sub>2</sub> composite, (b) pore size distribution curve.

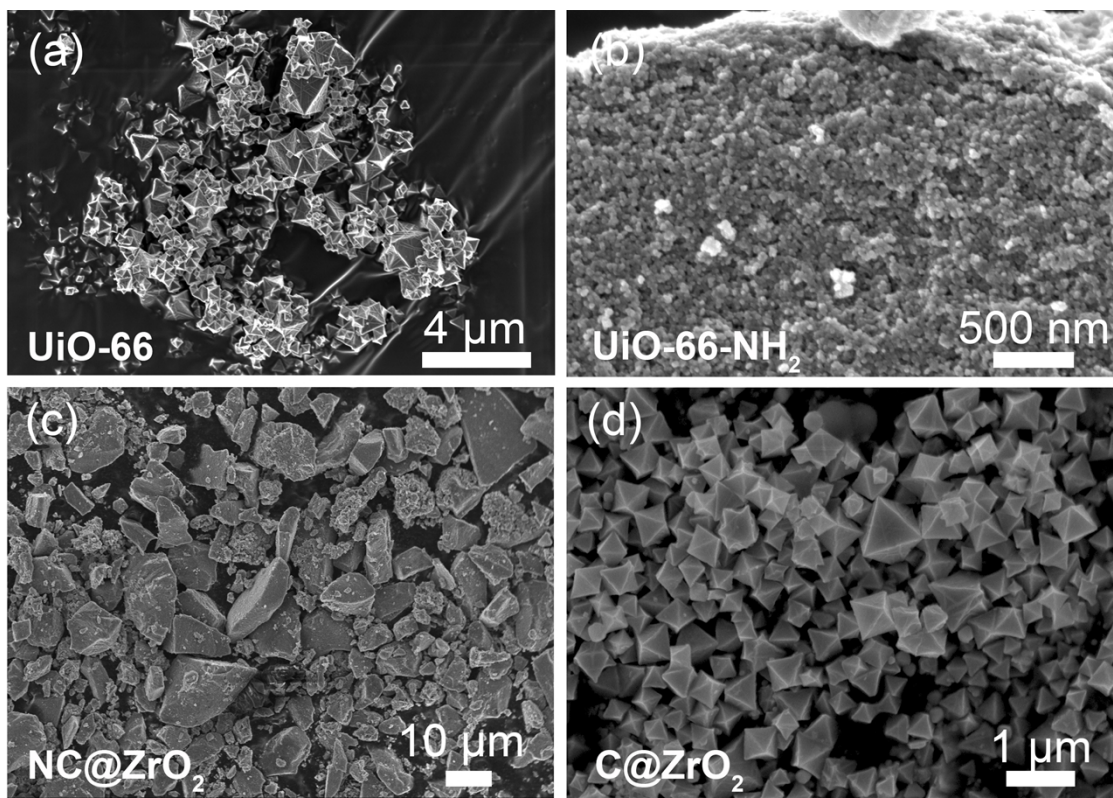

**Fig. S4 SEM images of UiO-66, UiO-66-NH<sub>2</sub> and the derived composites. (a) UiO-66. (b) UiO-66-NH<sub>2</sub>. (c) NC@ZrO<sub>2</sub> composite (d) C@ZrO<sub>2</sub> composite..**

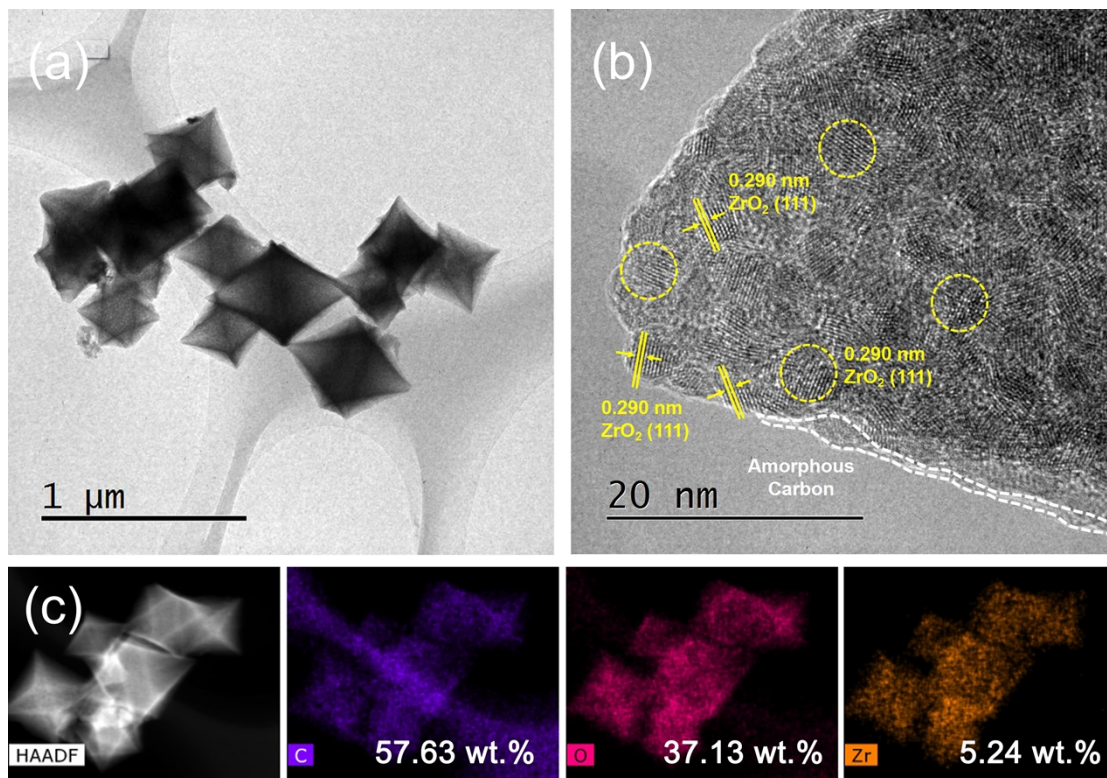

**Fig. S5 TEM characterizations of  $\text{C@ZrO}_2$  composite.** (a) TEM image. (b) HRTEM image. (c) TEM-EDS elemental mapping of the  $\text{C@ZrO}_2$  composite, and the mass ratio of C, O, and Zr.

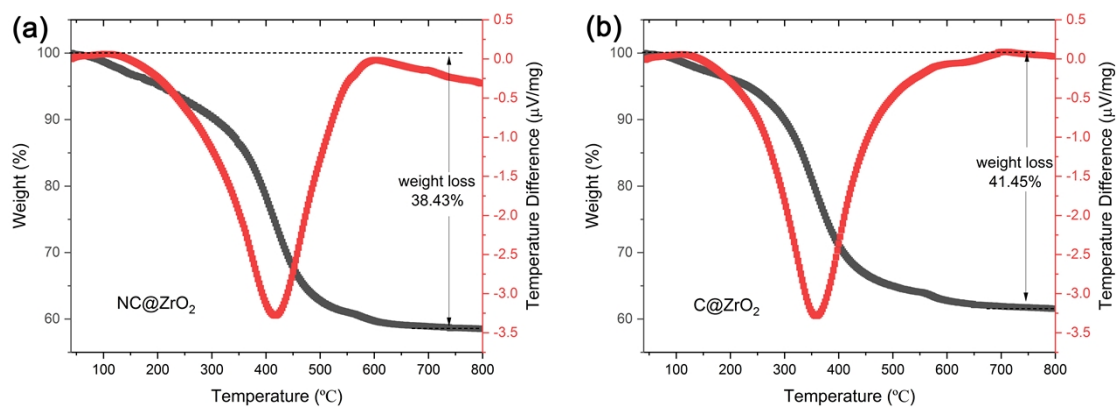

**Fig. S6 TG-DTA analysis of NC@ZrO<sub>2</sub> and C@ZrO<sub>2</sub> composites. (a) NC@ZrO<sub>2</sub>. (b) C@ZrO<sub>2</sub>.**

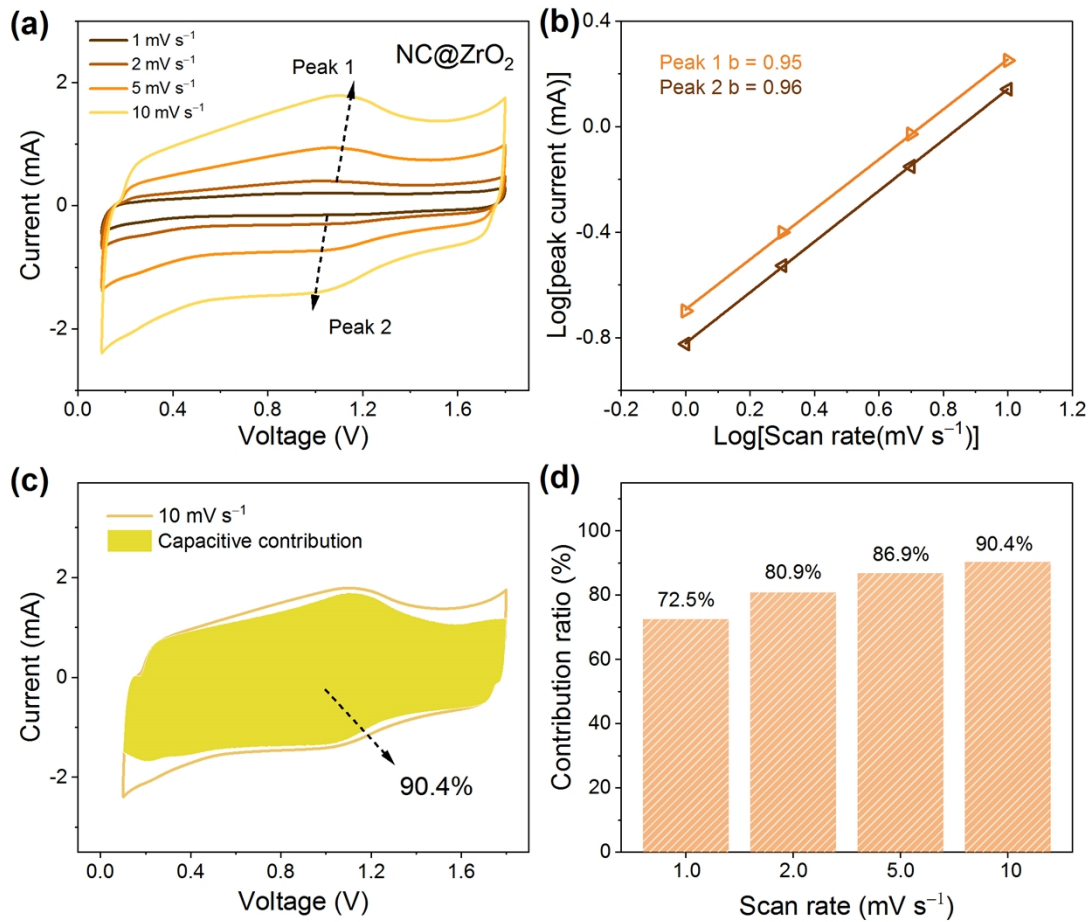

**Fig. S7 Analysis of the redox pseudocapacitance-like contribution of NC@ZrO<sub>2</sub>.** (a) CV profiles of ZHC at different scan rates with NC@ZrO<sub>2</sub>. (b) The plots of log(*i*) vs log(*v*) (peak current: *i*, scan rate: *v*), calculated from CV curves. (c) The shaded region shows the CV profile with the capacitive contribution at a scan rate of 10.0 mV s<sup>-1</sup>. (d) Contribution ratio of capacitive at different scan rates.



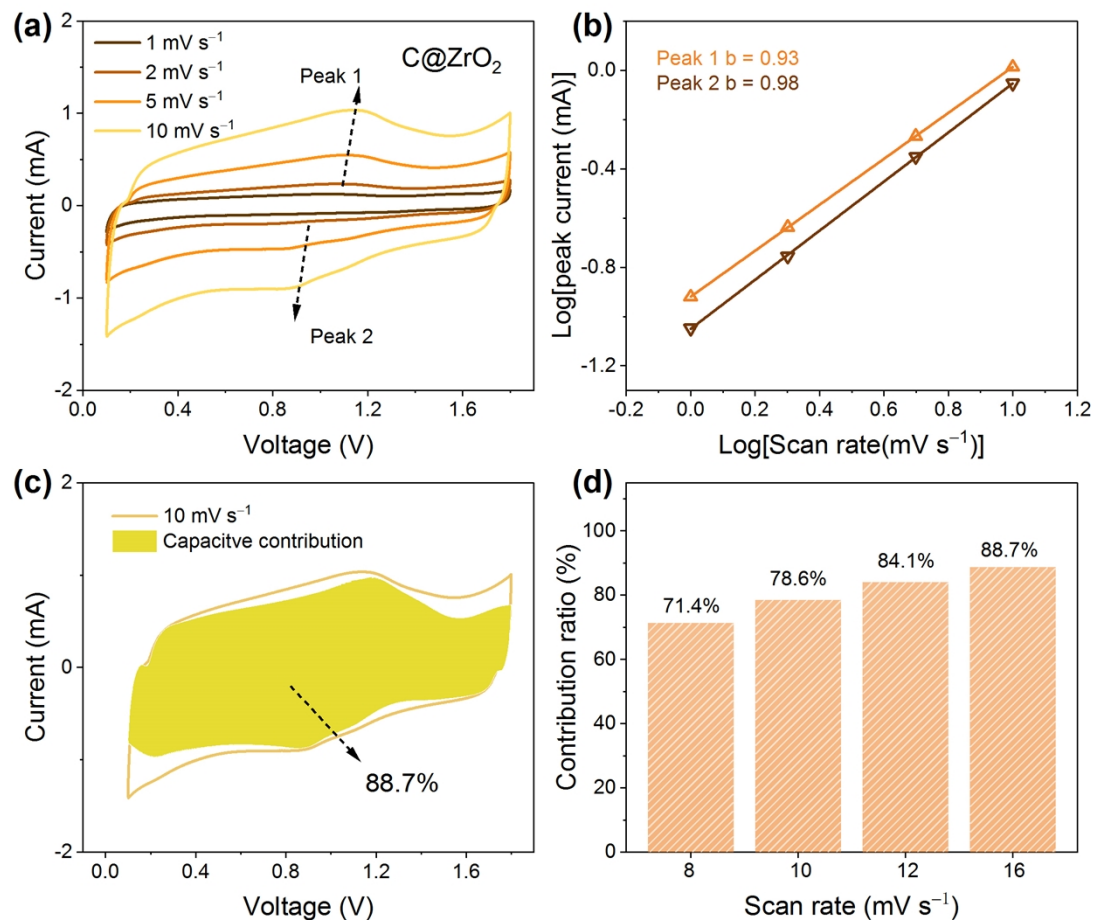

**Fig. S8 Analysis of the redox pseudocapacitance-like contribution of C@ZrO<sub>2</sub>.** (a) CV profiles of ZHC at different scan rates with C@ZrO<sub>2</sub>. (b) The plots of  $\log(i)$  vs  $\log(v)$  (peak current:  $i$ , scan rate:  $v$ ), calculated from CV curves. (c) The shaded region shows the CV profile with the capacitive contribution at a scan rate of 10.0 mV s<sup>-1</sup>. (d) Contribution ratio of capacitive at different scan rates.

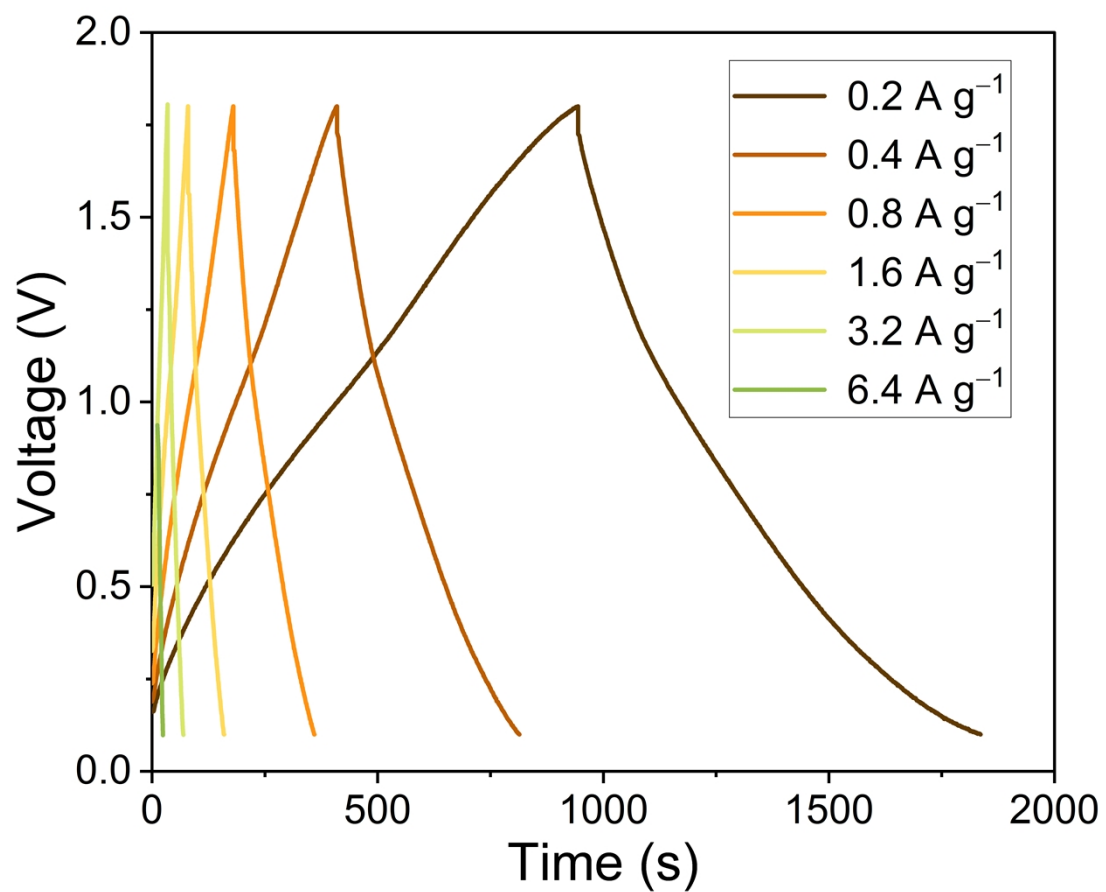

**Fig. S9** GCD curves of C@ZrO<sub>2</sub> based ZHSs at current ranging from 0.2 to 6.4 A g<sup>-1</sup>.

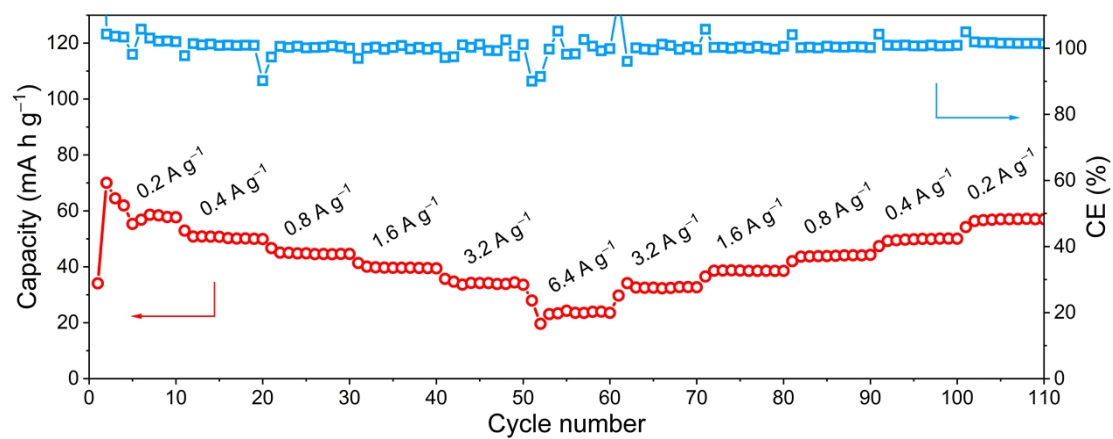

**Fig. S10** Rate performance of the C@ZrO<sub>2</sub> cathode.

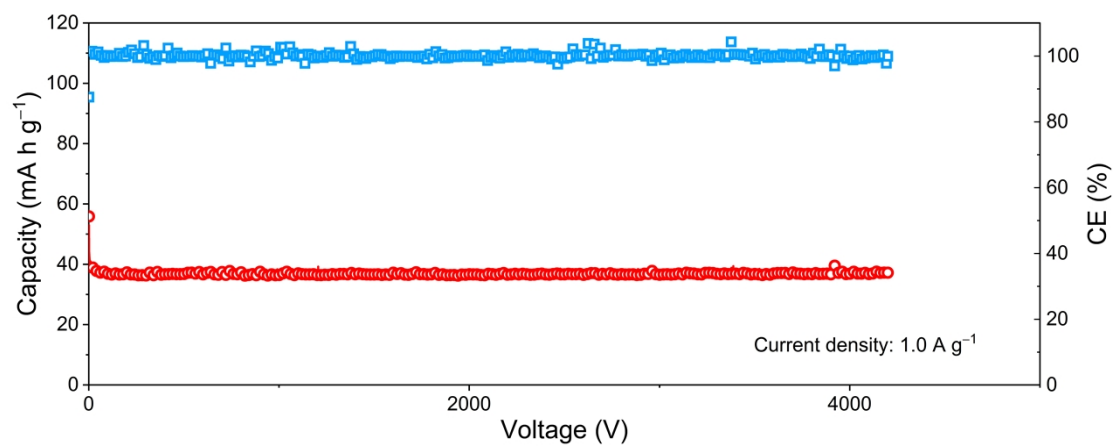

**Fig. S11** Long-cycling performance of C@ZrO<sub>2</sub>-based ZHS.
